# Supplementary material for: From Learning to Policy: Adapting National Cancer Control Plans and Implementation to Africa’s Cancer Control Realities
Source: Research Square preprint supplement (doi:10.21203/rs.3.rs-6364181/v1), 2025-05-13

**SUPPLEMENTARY MATERIAL**

**Appendix A: Session list for 2020-2021 Africa Cancer Research and Control ECHO Series**

| **Date** | **Topic** | **Case presenter institution(s), Country** | **Didactic presenter institution(s), Country** |
| --- | --- | --- | --- |
| 3 September 2020 | Survivorship, follow-up, and long-term care | Kenyatta National Hospital, Nairobi, Kenya | US National Cancer Institute, Rockville, MD, USA |
| 17 September 2020 | The key role of cancer survivors in national cancer control planning | Cancer Café, Nairobi, Kenya | Ministerial Advisory Committee on Cancer Prevention and Control, Republic of South Africa |
| 1 October 2020 | Palliative care and psychosocial support | Ministry of Health, Eswatini | City Cancer Challenge, Kibagabaga Hospital, Kigali, Rwanda |
| 15 October 2020 | Paediatric cancers | Lagos University Teaching Hospital, Dorcas Foundation, Lagos, Nigeria | St. Jude Global, St. Jude Children’s Research Hospital, Memphis, TN, USA |
| 5 November 2020 | Challenges in cancer care for vulnerable populations | UNC Project-Malawi, Lilongwe, Malawi | Kenya Medical Research Institute, Nairobi, Kenya; University of Washington, Seattle, USA |
| 19 November 2020 | The role of patient navigation in cancer care | Kilele Challenge, Nairobi, Kenya | George Washington University, Washington, DC, USA |
| 1 December 2020 | Utilization of mHealth in cancer early detection | Queens University, Canada; Rwanda Military Hospital; US National Cancer Institute, Rockville, USA; NYU Langone Cancer Center, New York, USA | |
| 21 January 2021 | Access to medicines and diagnostics | Kenya Ministry of Health, Nairobi, Kenya | University of Pennsylvania Health System, Philadelphia, USA |
| 4 February 2021 | Planning and costing cancer prevention strategies | Research Care and Training Program, Migori, Kenya | Wits Health Consortium, University of Witwatersrand, Johannesburg, South Africa |
| 4 March 2021 | Building and funding for collaborative cancer research and control partnerships | Muhimbili University of Health and Allied Sciences-Ocean Road Cancer Institute, Dar es Salaam, Tanzania;  Global Cancer Program, University of California San Francisco Helen Diller Family Comprehensive Cancer Center, San Francisco, CA, USA | Center for Global Health, National Cancer Institute, Rockville, MD, USA |
| 15 April 2021 | Implementation research opportunities and capacity building needs | African Behavioral Research Center, Nigeria | Division of Cancer Control and Population Sciences, US National Cancer Institute, Rockville, USA |
| 6 May 2021 | Research dissemination, uptake, and incorporation into the National Cancer Control Plan (NCCP) | Migori District Hospital, Migori, Kenya;  National Cancer Control Program, Kenya Ministry of Health, Nairobi, Kenya | |
| 20 May 2021 | The role of radiation in the cancer control continuum | National Hospital, Abuja, Nigeria | Parirenyatwa Hospital, Harare, Zimbabwe |
| 3 June 2021 | Improving equity in cancer research and control through patient engagement | National Hospital, Abuja, Nigeria | National Hospital, Abuja, Nigeria |
| 17 June 2021 | Integration of cancer services into existing health programs | Cancer Diseases Hospital, Zambia College of Medicine and Surgery, Zambia | World Health Organization, AFRO, Harare, Zimbabwe |
| 1 July 2021 | Nuts and bolts of clinical practice guidelines – selecting, adapting, implementing, measuring | Kenyatta National Hospital, Nairobi, Kenya | International Cancer Institute, Eldoret, Kenya |
| 15 July 2021 | Role of telehealth in cancer control | College of Medicine, University of Lagos, Nigeria; Oncopadi Digital Cancer Clinic and Sebeccly Cancer Care, Lagos, Nigeria | Department of Population Health, NYU Langone, New York, USA |
| 4 August 2021 | Measuring impact and improvement in cancer care in Africa | University of Nigeria Teaching Hospital, Enugu, Nigeria | International Agency for Research on Cancer, World Health Organization, Lyons, France |
| 19 August 2021 | Prostate cancer | University College Hospital Ibadan, Nigeria | Covenant University, Nigeria |

**Appendix B: Codebook for content analysis**

| **Core Elements of National Cancer Control Plans and Definitions** | | |
| --- | --- | --- |
| Parent Code | Definition | Subcodes |
| Prevention | In medicine, an action taken to decrease the chance of getting a disease or condition. For example, cancer prevention includes avoiding risk factors (such as smoking, obesity, lack of exercise, and radiation exposure) and increasing protective factors (such as getting regular physical activity, staying at a healthy weight, and having a healthy diet). | - Vaccination (HPV, HBV) - Risk factors (environment, occupational) - Cancer awareness/public education (prevention) - Disease risk factors (Hep C, HIV) - Tobacco control - Modifiable risk factors (tobacco/alcohol use, physical activity, nutrition) |
| Diagnosis, Staging, and Screening | Diagnosis is the process of identifying cancer from its signs and symptoms. Cancer diagnosis includes a health history, physical exam, blood tests, imaging tests, and biopsies may be used to make a cancer diagnosis. Staging is the process of determining details about cancer, such as tumor size and whether it has spread. The stage guides treatment decisions. Screening is looking for cancer before symptoms appear, when cancer may be easier to treat. | - Cancer awareness/public education (early detection) - Pathology reporting/training/access - Breast cancer screening/early detection - Cervical cancer screening/early detection - Primary care/primary care training (diagnosis) - Cancer-specific early detection (colon, oral, childhood) - Cancer diagnosis/staging guidelines |
| Treatment | The use of surgery, radiation, medications, and other therapies to cure a cancer, shrink a cancer, or stop the progression of a cancer. | - Pediatric cancer care/guidelines - Treatment guidelines/protocols - Essential medicines list/procurement/supply chain - Radiation oncology/training - Multi-disciplinary teams/coordination of care - Devices/machinery/technology - Guidelines implementation/quality control - National guidelines (cancer-specific) - Surgical oncology/training |
| Palliative Care and Survivorship | Survivorship care and palliative care both aim to provide patient-centered, supportive care focused on enhancing function, improving the quality of life of both patients and caregivers, addressing distress and persistent symptoms such as pain, and encouraging shared decision-making between clinicians and patients. | - Survivorship/follow-up/long-term care - Palliative care workforce/training - Psycho-social/non-physical care - Primary care/primary care training (palliative/supportive care) - Family/caregiver support - Home-based/community-based care - Pain management - Rehabilitation |
| Service Delivery | The management and delivery of health services so that clients receive a continuum of preventive and curative services, according to their needs over time and across different levels of the health system | - Vulnerable populations - Task shifting/decentralization - Community/family engagement and empowerment - Chemotherapy patient/staff safety |
| Governance | Governance involves ensuring strategic policy frameworks exist and are combined with effective oversight, coalition-building, regulation, attention to system design and accountability. | - Monitoring and evaluation - Accountability frameworks - Participatory governance - Patient/patient group involvement - Leadership in cancer control |
| Health Workforce | The health workforce refers to all of the people who deliver or assist in the delivery of health services or help operate health care facilities. This includes health care professionals working inside the health care sector as well as outside the health care sector. | - Health workforce strategy - Patient navigation (Health workforce) - Oncology nursing - Pharmacy |
| Health Information Systems | The health information system collects data from health and other relevant sectors, analyzes the data and ensures its overall quality, relevance and timeliness, and converts the data into information for health-related decision-making. | - Cancer clinical care indicators - Cancer registry/reports - Hospital-based registry |
| Research | Cancer research is research into cancer to identify causes and develop strategies for prevention, diagnosis, treatment, and cure. | - Cancer research plan - Cancer research funding |
| Finance | The function of a health system is concerned with the mobilization, accumulation, and allocation of money to cover the health needs of the people, individually and collectively, in the health system. The purpose of health financing is to make funding available, as well as to set the right financial incentives to providers, to ensure that all individuals have access to effective public health and personal health care. | - Costing - Financial resources - Financial protection for patients (financial toxicity) - Foreign aid - Multisectoral partnership - Sub-national/state level |

| **SWOT Analysis** | |
| --- | --- |
| Parent Code | Definition |
| Strength | Description of internal capabilities or resources that can be the basis of a subject's distinct advantage |
| Weakness | Description of internal factors in need of improvement or internal circumstances that prevent the subject from performing at its optimal level |
| Opportunity | Description of favorable external factors that could give the subject an advantage |  |
| Threat | Description of external factors that stand in the way of the subject's success and can potentially harm it |  |

| **Code Descriptors** | | |
| --- | --- | --- |
| SPEAKER DESCRIPTOR | Options |
| Country | Afghanistan, Albania, Algeria, Andorra, Angola, Antigua and Barbuda, Argentina, Armenia, Australia, Austria, Azerbaijan, The Bahamas, Bahrain, Bangladesh, Barbados, Belarus, Belgium, Belize, Benin, Bhutan, Bolivia, Bosnia and Herzegovina, Botswana, Brazil, Brunei, Bulgaria, Burkina Faso, Burundi, Cabo Verde, Cambodia, Cameroon, Canada, Central African Republic, Chad, Chile, China, Colombia, Comoros, Democratic Republic of the Congo, Republic of the Congo, Costa Rica, Côte d’Ivoire, Croatia, Cuba, Cyprus, Czech Republic, Denmark, Djibouti, Dominica, Dominican Republic, East Timor (Timor-Leste), Ecuador, Egypt, El Salvador, Equatorial Guinea, Eritrea, Estonia, Eswatini, Ethiopia, Fiji, Finland, France, Gabon, The Gambia, Georgia, Germany, Ghana, Greece, Grenada, Guatemala, Guinea,  Guinea-Bissau, Guyana, Haiti, Honduras, Hungary, Iceland, India, Indonesia, Iran, Iraq, Ireland, Israel, Italy, Jamaica, Japan, Jordan, Kazakhstan, Kenya, Kiribati, North Korea, South Korea, Kosovo, Kuwait, Kyrgyzstan, Laos, Latvia, Lebanon, Lesotho, Liberia, Libya, Liechtenstein, Lithuania, Luxembourg, Madagascar, Malawi, Malaysia, Maldives, Mali, Malta,  Marshall Islands, Mauritania, Mauritius, Mexico, Micronesia, Moldova,  Monaco, Mongolia, Montenegro, Morocco, Mozambique, Myanmar (Burma), Namibia, Nauru, Nepal, Netherlands, New Zealand, Nicaragua, Niger, Nigeria, North Macedonia, Norway, Oman, Pakistan, Palau, Panama, Papua New Guinea, Paraguay, Peru, Philippines, Poland, Portugal, Qatar, Romania, Russia, Rwanda, Saint Kitts and Nevis, Saint Lucia, Saint Vincent and the Grenadines, Samoa, San Marino, Sao Tome and Principe, Saudi Arabia, Senegal, Serbia, Seychelles, Sierra Leone, Singapore, Slovakia, Slovenia, Solomon Islands, Somalia, South Africa, Spain, Sri Lanka,  Sudan, South Sudan, Suriname, Sweden, Switzerland, Syria, Taiwan, Tajikistan, Tanzania, Thailand, Togo, Tonga, Trinidad and Tobago, Tunisia, Turkey, Turkmenistan, Tuvalu, Uganda, Ukraine, United Arab Emirates, United Kingdom, United States, Uruguay, Uzbekistan, Vanuatu, Vatican City, Venezuela, Vietnam, Yemen, Zambia, Zimbabwe |
| Institution | National/Governmental public health agency, international health agency,  private organization |
| Facility | Hospital, clinic and medical office, nursing home, mental health and addiction treatment center, birth center, hospice care facilities, dialysis facilities, imaging and radiology centers, orthopedic rehabilitation centers, long-term care hospitals, clinical lab, outpatient clinic |
| Occupation | Physician, Nursing and midwifery personnel, Dentistry personnel, pharmaceutical personnel, Laboratory health workers, Environmental and public health workers, community and traditional health workers, other health service providers, health management and support workers |
| REFERENCE DESCRIPTOR | Options |
| Country | Afghanistan, Albania, Algeria, Andorra, Angola, Antigua and Barbuda, Argentina, Armenia, Australia, Austria, Azerbaijan, The Bahamas, Bahrain, Bangladesh, Barbados, Belarus, Belgium, Belize, Benin, Bhutan, Bolivia, Bosnia and Herzegovina, Botswana, Brazil, Brunei, Bulgaria, Burkina Faso, Burundi, Cabo Verde, Cambodia, Cameroon, Canada, Central African Republic, Chad, Chile, China, Colombia, Comoros, Democratic Republic of the Congo, Republic of the Congo, Costa Rica, Côte d’Ivoire, Croatia, Cuba, Cyprus, Czech Republic, Denmark, Djibouti, Dominica, Dominican Republic, East Timor (Timor-Leste), Ecuador, Egypt, El Salvador, Equatorial Guinea, Eritrea, Estonia, Eswatini, Ethiopia, Fiji, Finland, France, Gabon, The Gambia, Georgia, Germany, Ghana, Greece, Grenada, Guatemala, Guinea,  Guinea-Bissau, Guyana, Haiti, Honduras, Hungary, Iceland, India, Indonesia, Iran, Iraq, Ireland, Israel, Italy, Jamaica, Japan, Jordan, Kazakhstan, Kenya, Kiribati, North Korea, South Korea, Kosovo, Kuwait, Kyrgyzstan, Laos, Latvia, Lebanon, Lesotho, Liberia, Libya, Liechtenstein, Lithuania, Luxembourg, Madagascar, Malawi, Malaysia, Maldives, Mali, Malta,  Marshall Islands, Mauritania, Mauritius, Mexico, Micronesia, Moldova,  Monaco, Mongolia, Montenegro, Morocco, Mozambique, Myanmar (Burma), Namibia, Nauru, Nepal, Netherlands, New Zealand, Nicaragua, Niger, Nigeria, North Macedonia, Norway, Oman, Pakistan, Palau, Panama, Papua New Guinea, Paraguay, Peru, Philippines, Poland, Portugal, Qatar, Romania, Russia, Rwanda, Saint Kitts and Nevis, Saint Lucia, Saint Vincent and the Grenadines, Samoa, San Marino, Sao Tome and Principe, Saudi Arabia, Senegal, Serbia, Seychelles, Sierra Leone, Singapore, Slovakia, Slovenia, Solomon Islands, Somalia, South Africa, Spain, Sri Lanka,  Sudan, South Sudan, Suriname, Sweden, Switzerland, Syria, Taiwan, Tajikistan, Tanzania, Thailand, Togo, Tonga, Trinidad and Tobago, Tunisia, Turkey, Turkmenistan, Tuvalu, Uganda, Ukraine, United Arab Emirates, United Kingdom, United States, Uruguay, Uzbekistan, Vanuatu, Vatican City, Venezuela, Vietnam, Yemen, Zambia, Zimbabwe |
| Cancer | Acute Lymphoblastic Leukemia (ALL), Acute Myeloid Leukemia (AML), Adrenocortical Carcinoma, Kaposi Sarcoma, AIDS-Related Lymphoma, Primary CNS Lymphoma, Anal Cancer, Brain Cancer, Bile Duct Cancer, Bladder Cancer, Bone Cancer, Breast Cancer, Lung Cancer, Burkitt Lymphoma (Non-Hodgkin Lymphoma), Carcinoma of Unknown  Primary, Medulloblastoma, Cervical Cancer, Chronic Lymphocytic Leukemia (CLL), Chronic Myelogenous Leukemia (CML), Chronic Myeloproliferative Neoplasms, Colorectal Cancer, Medulloblastoma, Endometrial Cancer (Uterine Cancer), Ependymoma, Esophageal Cancer, Head and Neck Cancer, Intraocular Melanoma, Retinoblastoma, Fallopian Tube Cancer, Gallbladder Cancer, Gastric (Stomach) Cancer, Testicular Cancer, Hairy Cell Leukemia, Hepatocellular (Liver) Cancer, Langerhans Cell (Hodgkin Lymphoma), Kaposi Sarcoma (Soft Tissue Sarcoma), Kidney (Renal Cell)  Cancer, Leukemia, Lung Cancer, Lymphoma, Melanoma, Merkel Cell Carcinoma (Skin Cancer), Mesothelioma (Malignant), Midline Tract Carcinoma With NUT Gene Changes, Multiple Endocrine Neoplasia Syndromes, Multiple Myeloma/Plasma Cell Neoplasms, Mycosis Fungoides (Lymphoma), Oral Cancer, Ovarian Cancer, Pancreatic Cancer, Paraganglioma, Parathyroid Cancer, Penile Cancer, Pheochromocytoma, Plasma Cell Neoplasm/Multiple Myeloma, Primary Peritoneal Cancer, Prostate Cancer, Rectal Cancer, Renal Cell (Kidney) Cancer, Rhabdomyosarcoma (Childhood, Soft Tissue Sarcoma), Small Intestine Cancer (Soft Tissue Sarcoma), Testicular Cancer, Thyroid Cancer, Urethral Cancer, Vaginal Cancer, Vulvar Cancer |
| Institution | National/Governmental (public) health organization, international health organization, private health organization |
| Facility | Hospital, clinic and medical office, nursing home, mental health and addiction treatment center, birth center, hospice care facilities, dialysis facilities, imaging and radiology centers, orthopedic rehabilitation centers, long-term care hospitals, clinical lab, outpatient clinic, home health care, ambulatory care center, school health clinic, skilled nursing facilities |
| Occupation | Physician, Nursing and midwifery personnel, Dentistry personnel, pharmaceutical personnel, Laboratory health workers, Environmental and public health workers, community and traditional health workers, other health service providers, health management and support workers |

**Appendix C: Number of Coded Excerpts by SWOT and NCCP Core Elements**


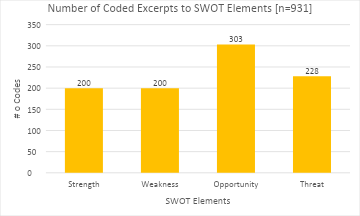


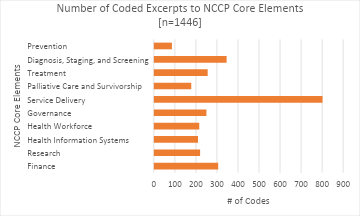


**Appendix D: Number of Subcoded Excerpts by NCCP Core Elements Subcodes**


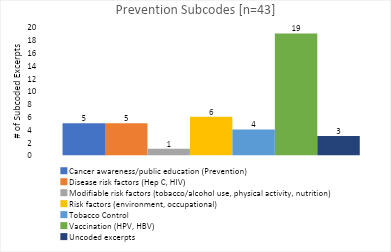


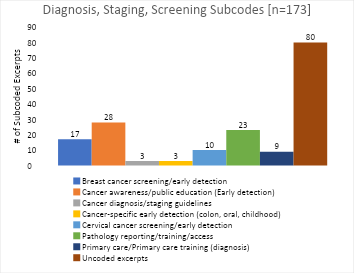


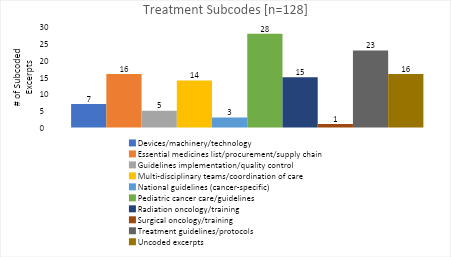


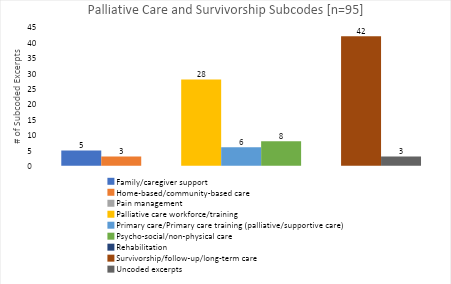


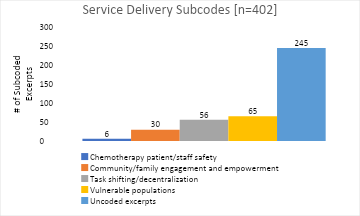


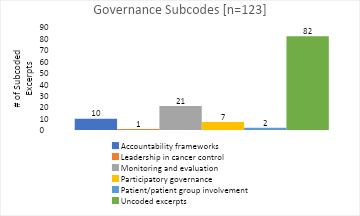


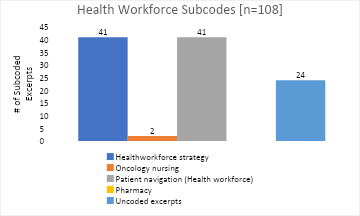


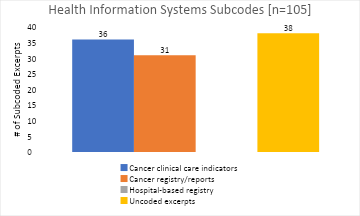


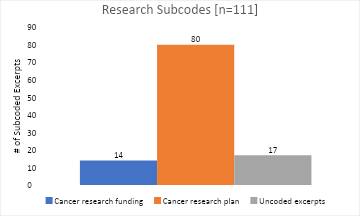


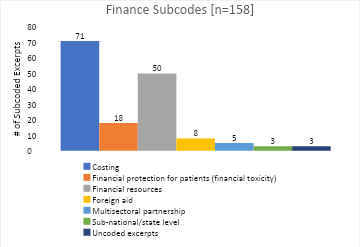

Supplement: Supplementary file 1 [file 01b99da3060c29d73e58902f.docx]
